# Supplementary material
Source: Research Square preprint supplement (doi:10.21203/rs.3.rs-9347106/v1)
Supplement: Supplementary file 1 [file 4b71a8f9f15672b00300c2e9.pdf]

Supplementary material

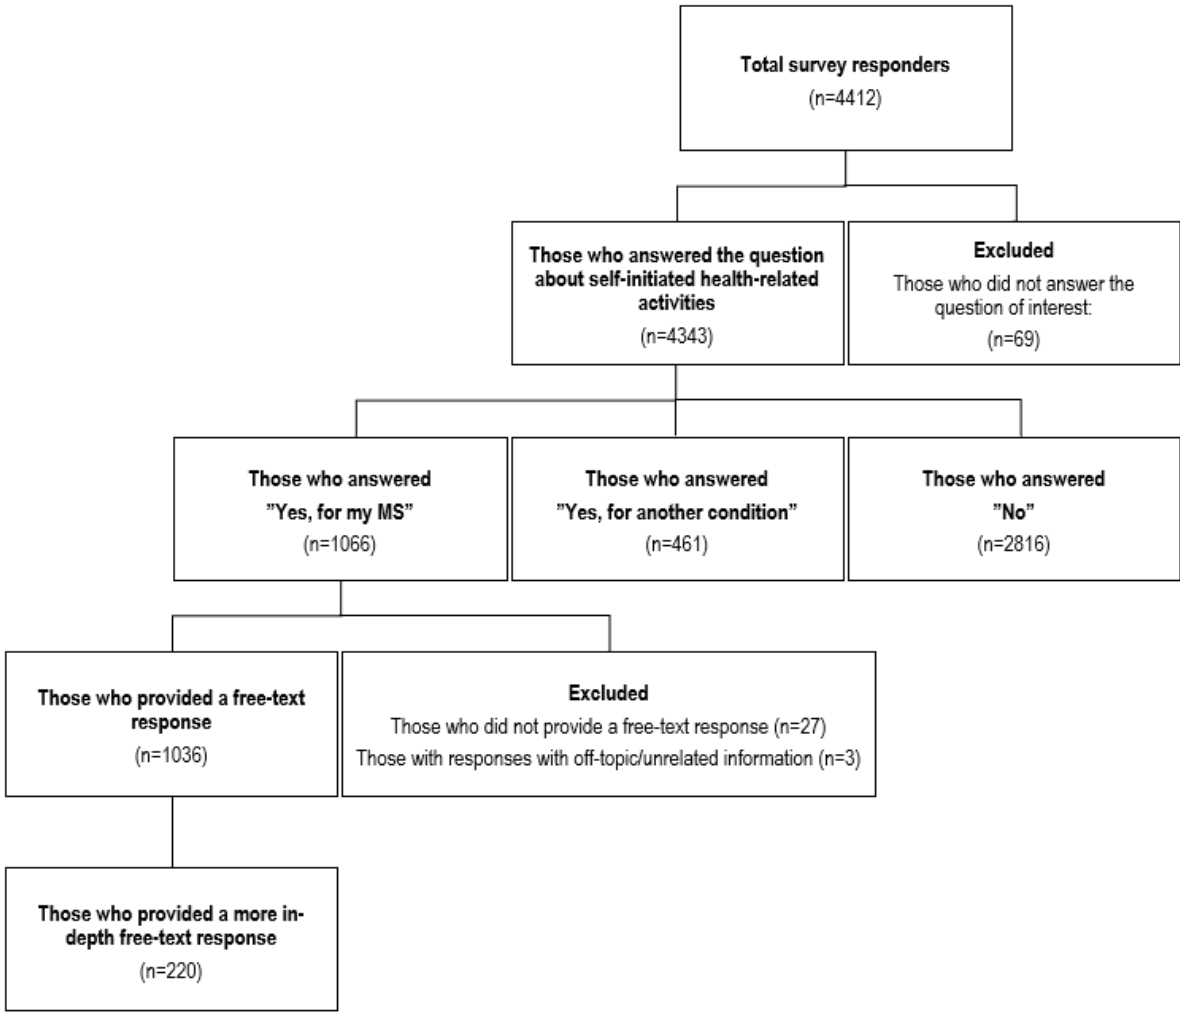

Figure S1. Flowchart of the total study participants' responses to the question: "In the past 12 months, have you performed any health activity or are you using any other form of treatment that was not prescribed or recommended to you by a doctor (e.g., exercise, dietary supplements, or CBD oil)?"

**Table S1. Sociodemographic and clinical characteristics of the subset of free-text responders who provided more in-depth responses to the survey question of interest**

|                                                                                                                                                                                                                                  |                               |
|----------------------------------------------------------------------------------------------------------------------------------------------------------------------------------------------------------------------------------|-------------------------------|
| <i>"In the past 12 months, have you performed any health activity or are you using any other form of treatment that was not prescribed or recommended to you by a doctor (e.g., exercise, dietary supplements, or CBD oil)?"</i> |                               |
|                                                                                                                                                                                                                                  | <b>TOTAL</b><br>(n=220; 100%) |
| <b>Sex</b>                                                                                                                                                                                                                       |                               |
| Women                                                                                                                                                                                                                            | 161 (73.2%)                   |
| Men                                                                                                                                                                                                                              | 59 (26.8%)                    |
| <b>Age (years)</b>                                                                                                                                                                                                               |                               |
| 20-39 years                                                                                                                                                                                                                      | 93 (42.3%)                    |
| 40-50+ years                                                                                                                                                                                                                     | 127 (57.7%)                   |
| <b>University-level education</b>                                                                                                                                                                                                |                               |
| Non-university                                                                                                                                                                                                                   | 64 (29.1%)                    |
| University                                                                                                                                                                                                                       | 156 (70.9%)                   |
| <b>Born in Sweden</b>                                                                                                                                                                                                            |                               |
| Yes                                                                                                                                                                                                                              | 195 (88.6%)                   |
| No                                                                                                                                                                                                                               | 25 (11.4)                     |
| <b>Type of living area</b>                                                                                                                                                                                                       |                               |
| Cities                                                                                                                                                                                                                           | 119 (54.1%)                   |
| Towns and suburbs                                                                                                                                                                                                                | 78 (35.5%)                    |
| Rural areas                                                                                                                                                                                                                      | 23 (10.5%)                    |
| <b>Type of MS</b>                                                                                                                                                                                                                |                               |
| Relapsing-remitting MS                                                                                                                                                                                                           | 199 (90.5%)                   |
| <b>MS severity</b>                                                                                                                                                                                                               |                               |
| Mild (EDSS=0-2.5)                                                                                                                                                                                                                | 135 (61.4%)                   |
| Moderate-Severe (EDSS=3-9.5)                                                                                                                                                                                                     | 44 (20.0%)                    |
| <b>Ongoing MS treatment</b>                                                                                                                                                                                                      |                               |
| Yes                                                                                                                                                                                                                              | 200 (90.9%)                   |
| No                                                                                                                                                                                                                               | 20 (9.1%)                     |
| <b>Treatment satisfaction</b>                                                                                                                                                                                                    |                               |
| Yes                                                                                                                                                                                                                              | 162 (73.6%)                   |
| Partly/not satisfied                                                                                                                                                                                                             | 55 (25.0%)                    |

Abbreviations: EDSS, Expanded Disability Status Scale score; MS, multiple sclerosis. Missing values are not included in the table.
