# Supplementary material
Source: Research Square preprint supplement (doi:10.21203/rs.3.rs-9347106/v1)
Supplement: Supplementary file 2 [file d9ae8f09bd5ff5523c4d4a74.docx]

**Supplementary material**


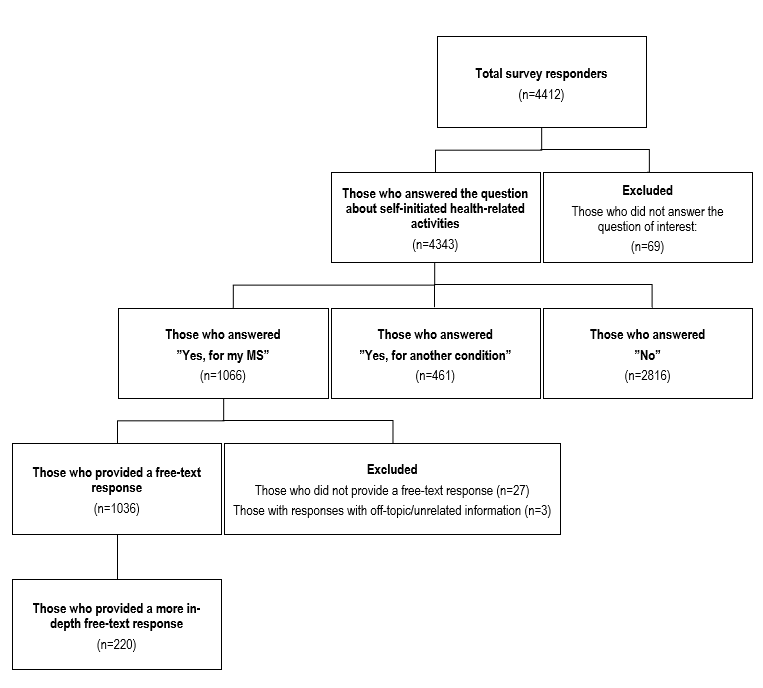


**Figure S1. Flowchart of the total study participants’ responses to the question: “In the past 12 months, have you performed any health activity or are you using any other form of treatment that was not prescribed or recommended to you by a doctor (e.g., exercise, dietary supplements, or CBD oil)?”**

**Table S1. Sociodemographic and clinical characteristics of the subset of free-text responders who provided more in-depth responses to the survey question of interest**

| ***“In the past 12 months, have you performed any health activity or are you using any other form of treatment that was not prescribed or recommended to you by a doctor (e.g., exercise, dietary supplements, or CBD oil)?”*** |  |
| --- | --- |
|  | **TOTAL**  **(n=220; 100%)** |
| **Sex** |  |
| Women | 161 (73.2%) |
| Men | (59 (26.8%) |
| **Age (years)** |  |
| 20-39 years | 93 (42.3%) |
| 40-50+ years | 127 (57.7%) |
| **University-level education** |  |
| Non-university | 64 (29.1%) |
| University | 156 (70.9%) |
| **Born in Sweden** |  |
| Yes | 195 (88.6%) |
| No | 25 (11.4) |
| **Type of living area** |  |
| Cities | 119 (54.1%) |
| Towns and suburbs | 78 (35.5%) |
| Rural areas | 23 (10.5%) |
| **Type of MS** |  |
| Relapsing-remitting MS | 199 (90.5%) |
| **MS severity** |  |
| Mild (EDSS=0-2.5) | 135 (61.4%) |
| Moderate-Severe (EDSS=3-9.5) | 44 (20.0%) |
| **Ongoing MS treatment** |  |
| Yes | 200 (90.9%) |
| No | 20 (9.1%) |
| **Treatment satisfaction** |  |
| Yes | 162 (73.6%) |
| Partly/not satisfied | 55 (25.0%) |

Abbreviations: EDSS, Expanded Disability Status Scale score; MS, multiple sclerosis. Missing values are not included in the table.
